# Supplementary material
Source: PubMed Central journal article supplement (PMC10621753)

Supplemental Data

| Supplemental Table 1 Baseline Characteristics of Patients With Sarcomatoid Urothelial Carcinoma (SUC) |            |
|-------------------------------------------------------------------------------------------------------|------------|
| N = 43                                                                                                | n (%)      |
| Gender                                                                                                |            |
| Male                                                                                                  | 31 (72)    |
| Female                                                                                                | 12 (28)    |
| Race                                                                                                  |            |
| Non-Hispanic White                                                                                    | 39 (91)    |
| Hispanic White                                                                                        | 2 (5)      |
| African American                                                                                      | 1 (2)      |
| Asian                                                                                                 | 1 (2)      |
| Median age (y, IQR)                                                                                   | 70 (61-76) |
| ECOG at diagnosis                                                                                     |            |
| ECOG 0 - 1                                                                                            | 41 (95)    |
| ECOG 2+                                                                                               | 2 (5)      |
| Hazard exposure                                                                                       |            |
| Smoking                                                                                               | 32 (74)    |
| Pelvic RT Hx                                                                                          | 3 (7)      |
| Stage at diagnosis                                                                                    |            |
| cT2                                                                                                   | 21 (49)    |
| cT3/4                                                                                                 | 22 (51)    |
| Nodal disease-NO-N3 (imaging)                                                                         | 8 (19)     |
| Metastatic disease-M1                                                                                 | 3 (7)      |
| CIS+ (TURBT)                                                                                          | 12 (28)    |
| LVI+ (TURBT)                                                                                          | 4 (9)      |
| Other histologies (TURBT)                                                                             |            |
| Squamous                                                                                              | 11 (25)    |
| Glandular                                                                                             | 2 (5)      |
| Micropapillary                                                                                        | 1 (2)      |
| Plasmacytoid                                                                                          | 1 (2)      |
| Undifferentiated                                                                                      | 1 (2)      |

Abbreviations: CIS = carcinoma in situ; cT = clinical tumor stage; ECOG = eastern cooperative oncology group; Hx = history; IQR = interquartile range; LVI = lymphovascular invasion; RT = radiotherapy; TURBT = transurethral resection of bladder tumor.

# Sarcomatoid Urothelial Carcinoma Is Associated With Limited Response

**Supplemental Table 2** NAC Information for Each Patient

| Patient ID | T stage | N stage | Regimen                                                                                                                                                       | Number of cycles |
|------------|---------|---------|---------------------------------------------------------------------------------------------------------------------------------------------------------------|------------------|
| 1          | T4      | N0      | Gem/Cis                                                                                                                                                       | 4                |
| 2          | T2      | N0      | 1 cycle of ddMVAC then discontinued due to renal and hematologic toxicity, the Gem/Cis for 2nd cycle but Gem was held on cycle 2 day 15; Gem only for cycle 3 | 3                |
| 3          | T2      | N0      | Gem/Cis                                                                                                                                                       | 4                |
| 4          | T3      | N1      | ddMVAC                                                                                                                                                        | 2                |
| 5          | T4      | N2      | Gem/Cis                                                                                                                                                       | 4                |
| 6          | T3      | N0      | Gem/Cis                                                                                                                                                       |                  |
| 7          | T3      | 2       | Gem/Cis                                                                                                                                                       | 4                |
| 8          | T3      | N0      | ddMVAC                                                                                                                                                        | 3                |
| 9          | T2      | N1      | Gem/Cis                                                                                                                                                       | 3                |
| 10         | T3      | N0      | Gem/Cis                                                                                                                                                       | NA               |
| 11         | T2      | N1      | Gem/Cis                                                                                                                                                       | 4                |
| 12         | T3      | N0      | Gem/Cis                                                                                                                                                       | 4                |
| 13         | T3      | N0      | ddMVAC                                                                                                                                                        | 4                |
| 14         | T3      | N0      | ddMVAC                                                                                                                                                        | 4                |
| 15         | T2      | N2      | Gem/Cis                                                                                                                                                       | 5                |
| 16         | T2      | N0      | ddMVAC                                                                                                                                                        | 3                |
| 17         | T3      | N0      | Gem alone                                                                                                                                                     | 4                |

Abbreviations: ddMVAC = dose-dense methotrexate, vinblastine, doxorubicin, and cisplatin; Gem = Gemcitabine; NA = Not applicable.

**Supplemental Table 3** Multivariate Cox Regression Analysis for Factors Associated With OS in the SEER Cohort, for Patients With Sarcomatoid Histology, Treated With Radical Cystectomy

| Variables              | N = 83<br>N (%) | Multivariate cox<br>HR (95% CI) | P-Value |
|------------------------|-----------------|---------------------------------|---------|
| <b>Age category</b>    |                 |                                 |         |
| 66-70                  | 21              | REF                             |         |
| 71-75                  | 30              | 0.99 (0.45-2.15)                | .97     |
| 76-80                  | 19              | 1.52 (0.64-3.60)                | .34     |
| 81+                    | 13              | 2.76 (1.08-7.05)                | .03     |
| <b>Race</b>            |                 |                                 |         |
| White                  | 76 (92)         | REF                             |         |
| African American       | 4 (5)           | 2.29 (0.57-9.24)                | .25     |
| Asian/Pacific Islander | 3 (3)           | 1.27 (0.16-10.23)               | .83     |
| <b>T stage</b>         |                 |                                 |         |
| T2                     | 39 (47)         | REF                             |         |
| T3                     | 31 (37)         | 2.67 (1.37-5.19)                | .004    |
| T4                     | 13 (16)         | 4.13 (1.83-9.28)                | .001    |
| <b>N stage</b>         |                 |                                 |         |
| N0                     | 65 (78)         | REF                             |         |
| N1                     | 18 (22)         | 1.34 (0.67-2.69)                | .41     |
| <b>NAC</b>             |                 |                                 |         |
| No NAC                 | 60 (72)         | REF                             |         |
| Non-SOC NAC            | 9 (11)          | 0.87 (0.40-1.94)                | .74     |
| SOC NAC                | 14 (17)         | 0.89 (0.33-2.40)                | .82     |

Abbreviations: CI = confidence interval, HR = hazard ratio, NAC = neoadjuvant chemotherapy, SOC = standard of care.

**Supplemental Table 4** Comparison Table of Published Cohorts of Patients With SUC Treated With RC

| Reference                          | N (RC) | <pT2    | pT2     | pT3/pT4 | pN+     | Median OS(m)         | ypT0N0    |
|------------------------------------|--------|---------|---------|---------|---------|----------------------|-----------|
| Present cohort                     | 38     | 6 (16)  | 7 (18)  | 25 (63) | 10 (26) | 19.7                 | 1/17 (6)  |
| Almassi et al. <sup>13</sup>       | 131    | 8 (6.1) | 39 (30) | 84 (64) | 26 (21) | NA                   | 5/38 (13) |
| Fatima et al. <sup>9</sup>         | 25     | 0 (0)   | 3 (12)  | 20 (88) | 12 (48) | NA                   | 0/2 (0)   |
| Sanfrancesco et al. <sup>8</sup>   | 22     | 0 (0)   | 6 (27)  | 16 (73) | 7 (32)  | 9.7                  | N/A       |
| Robinson et al. <sup>17</sup>      | 12     | 1 (8)   | 6 (50)  | 5 (42)  | 1 (8)   | 102                  | N/A       |
| Wang et al. <sup>19</sup>          | 8      | 2 (25)  | 3 (38)  | 3 (38)  | 2 (25)  | NA                   | N/A       |
| Sabate-Arroyo et al. <sup>18</sup> | 8      | N/A     | N/A     | N/A     | N/A     | 4.5-6.5 <sup>a</sup> | N/A       |
| Baseskioglu et al. <sup>3</sup>    | 4      | 0 (0)   | 1 (25)  | 3 (75)  | 3 (75)  | 6.7                  | 0         |

Abbreviations: N/A = not available (data not reported in the respective articles); OS = overall survival from diagnosis; pN = pathologic nodal stage; pT = pathologic tumor stage; RC = radical cystectomy; SUC = sarcomatoid urothelial carcinoma; ypT0N0 = pathologic complete response to neoadjuvant chemotherapy.

<sup>a</sup> 4.5 was for RC alone, 6.5 for patients who received adjuvant chemotherapy

**Supplemental Figure 1** Photomicrography of tumors with sarcomatoid components. A/B – Spindle cell morphology, characteristic of sarcomatous differentiation. C/D – Chondrosarcomatous mesenchymal component.

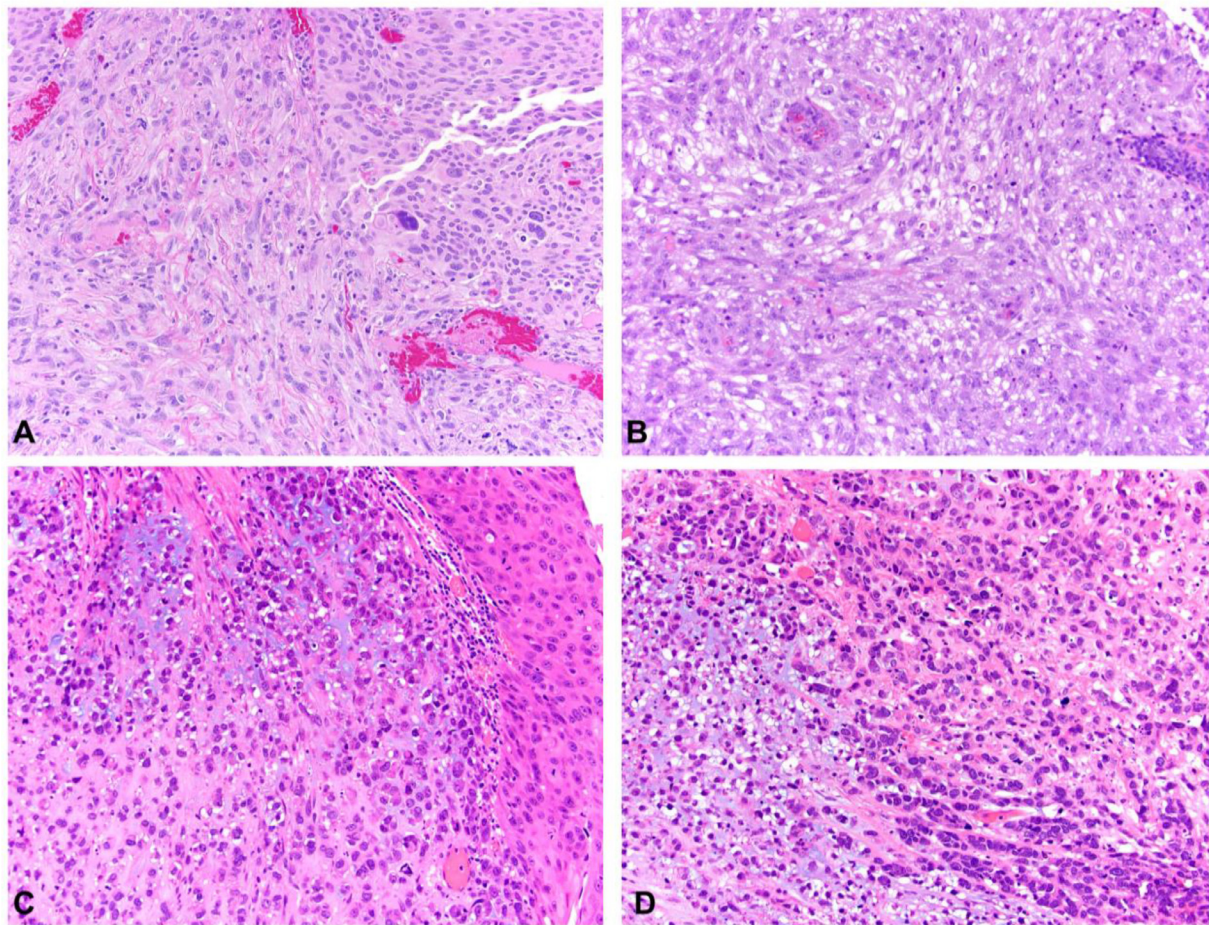

## Sarcomatoid Urothelial Carcinoma Is Associated With Limited Response

**Supplemental Figure 2A** Representative axial computed topography image of a 60-year-old man with sarcomatoid bladder cancer who developed a large pelvic cystic mass 2.6 months after radical cystectomy, later determined to represent cancer recurrence on pathology.

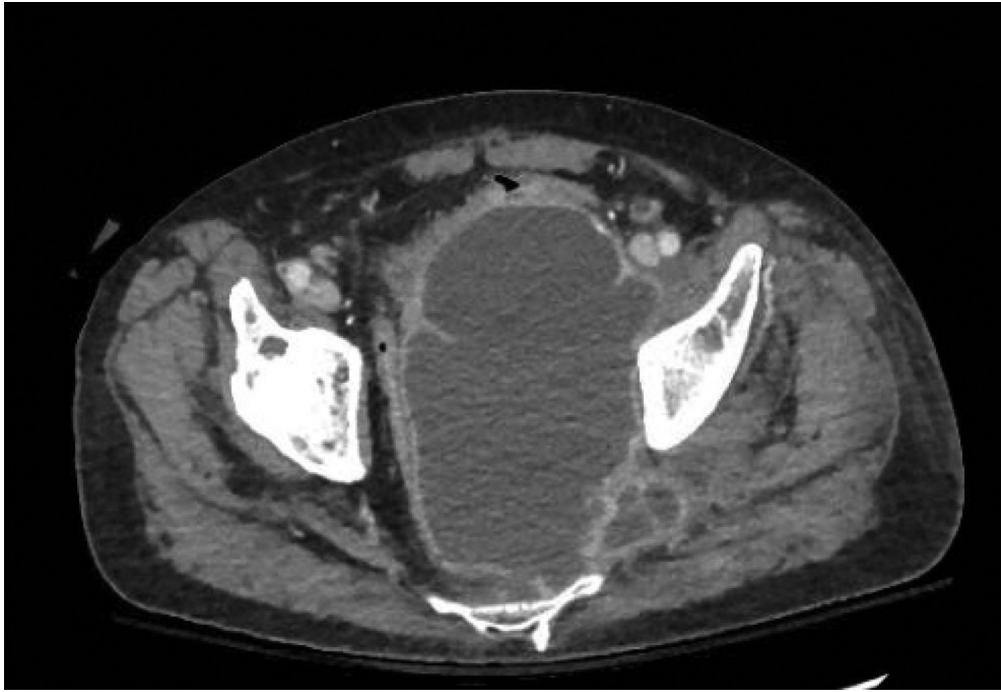

**Supplemental Figure 2B** Representative coronal computed topography image of a 50-year-old woman with sarcomatoid bladder cancer who developed a rapidly enlarging pelvic cystic mass 10.6 months after cystectomy, determined to be cancer recurrence on pathology.

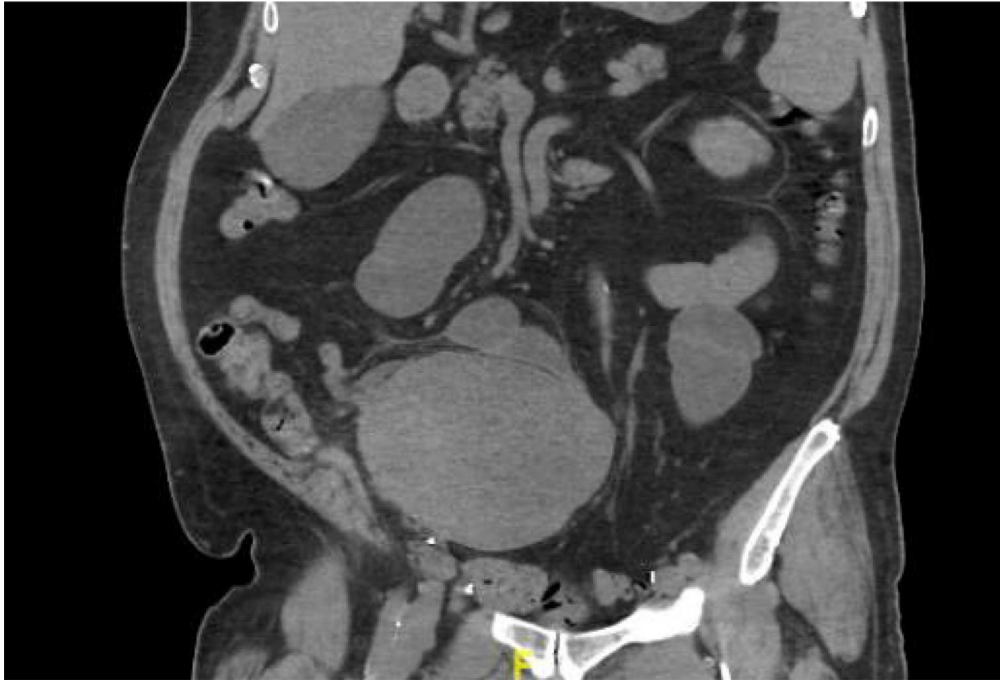

Supplement: NIHMS1940617-supplement-1.pdf [file NIHMS1940617-supplement-1.pdf]
